# Supplementary material for: Enhanced CO oxidation in porous metal-oxide nanoparticles derived from MOFs
Source: Royal Society of Chemistry journal article supplement (doi:10.1039/d3nj05267b), 2024-01-01
Supplement: d3nj05267b1.pdf [file d3nj05267b1.pdf]

# Enhanced CO Oxidation in Porous Metal-oxide Nanoparticles Derived from MOFs

Desong Luo,<sup>a,b,c</sup> Lingting Ye<sup>b,c,\*</sup> and KuiXie<sup>b,c,\*</sup>

<sup>a</sup> College of Chemistry, Fuzhou University, Fuzhou 350108, China.

<sup>b</sup> Key Laboratory of Design and Assembly of Functional Nanostructures, and Fujian Key Laboratory of Nanomaterials, Fujian Institute of Research on the Structure of Matter, Chinese Academy of Sciences, Fuzhou, Fujian 350002, China.

<sup>c</sup>Advanced Energy Science and Technology Guangdong Laboratory, 29 Sanxin North Road, Huizhou, Guangdong 116023, China.

\* Corresponding author: [ltye@fjirsm.ac.cn](mailto:ltye@fjirsm.ac.cn) (L. Ye), [kxie@fjirsm.ac.cn](mailto:kxie@fjirsm.ac.cn) (K. Xie)

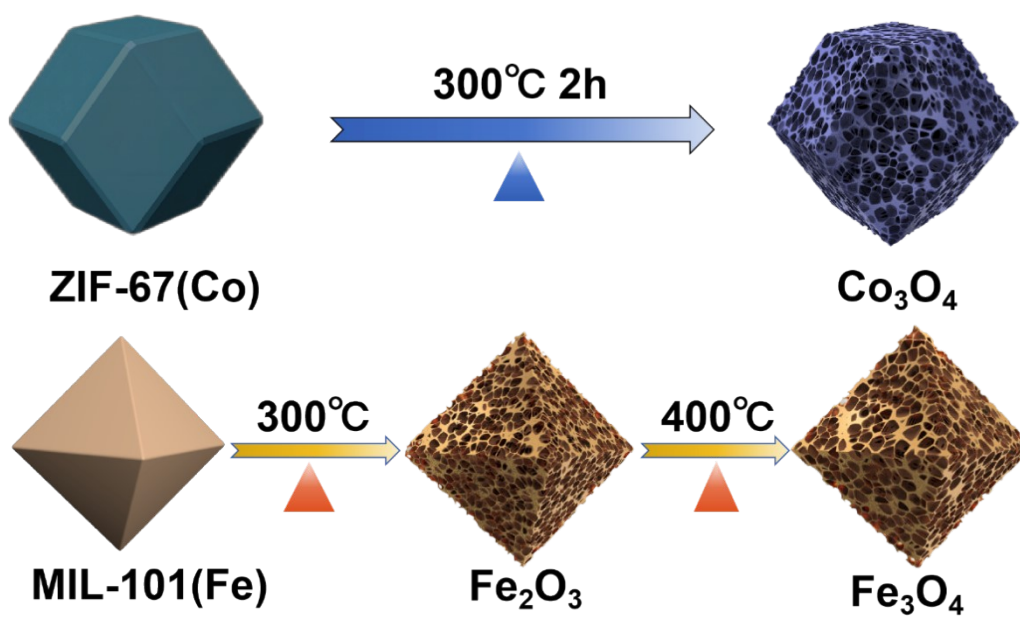

Fig. S1 Flow preparation chart of Co<sub>3</sub>O<sub>4</sub>, Fe<sub>2</sub>O<sub>3</sub> and Fe<sub>3</sub>O<sub>4</sub>.

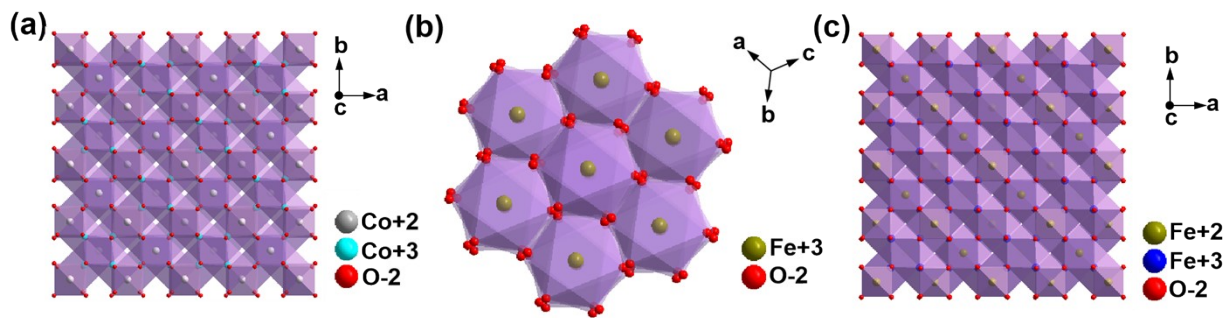

Fig. S2 The unit cell structure of (a)  $\text{Co}_3\text{O}_4$ , (b)  $\text{Fe}_2\text{O}_3$ , (c)  $\text{Fe}_3\text{O}_4$ .

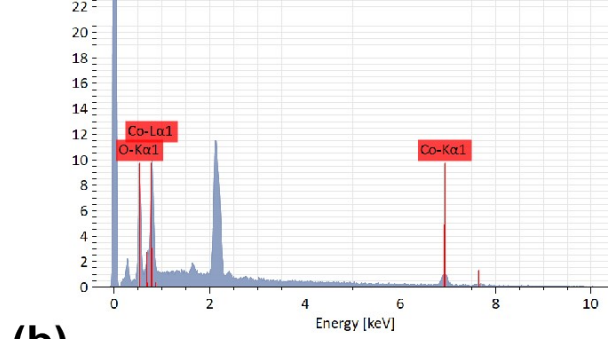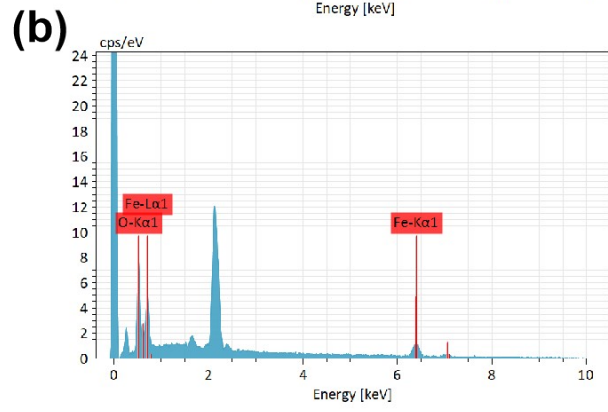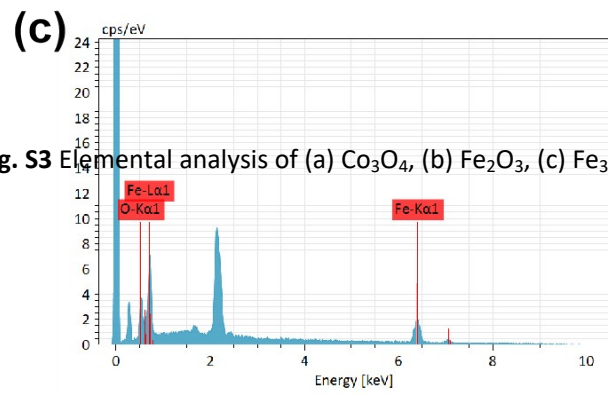

Fig. S3 Elemental analysis of (a)  $\text{Co}_3\text{O}_4$ , (b)  $\text{Fe}_2\text{O}_3$ , (c)  $\text{Fe}_3\text{O}_4$ .

(a)

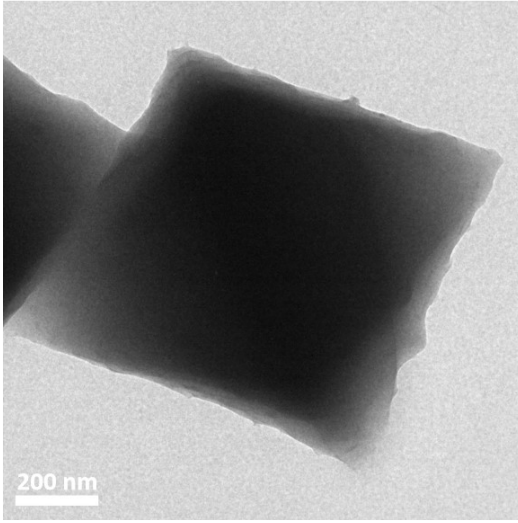

(b)

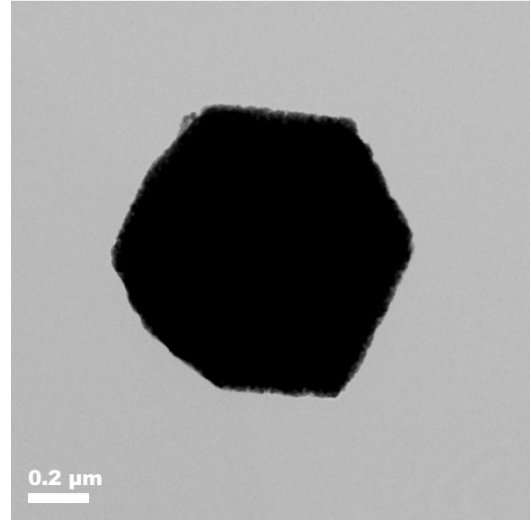

**Fig. S4** TEM images of (a) MIL-101(Fe) and (b) ZIF-67(Co).

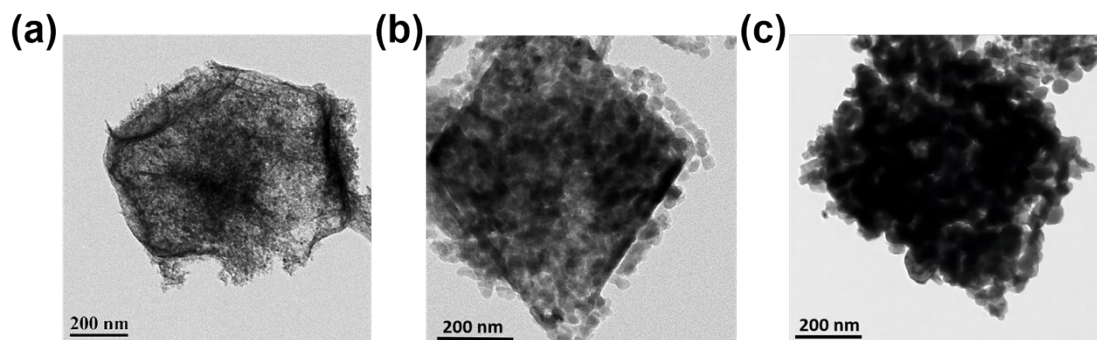

**Fig. S5** HRTEM images of (a)  $\text{Co}_3\text{O}_4$ , (b)  $\text{Fe}_2\text{O}_3$ , (c)  $\text{Fe}_3\text{O}_4$ .

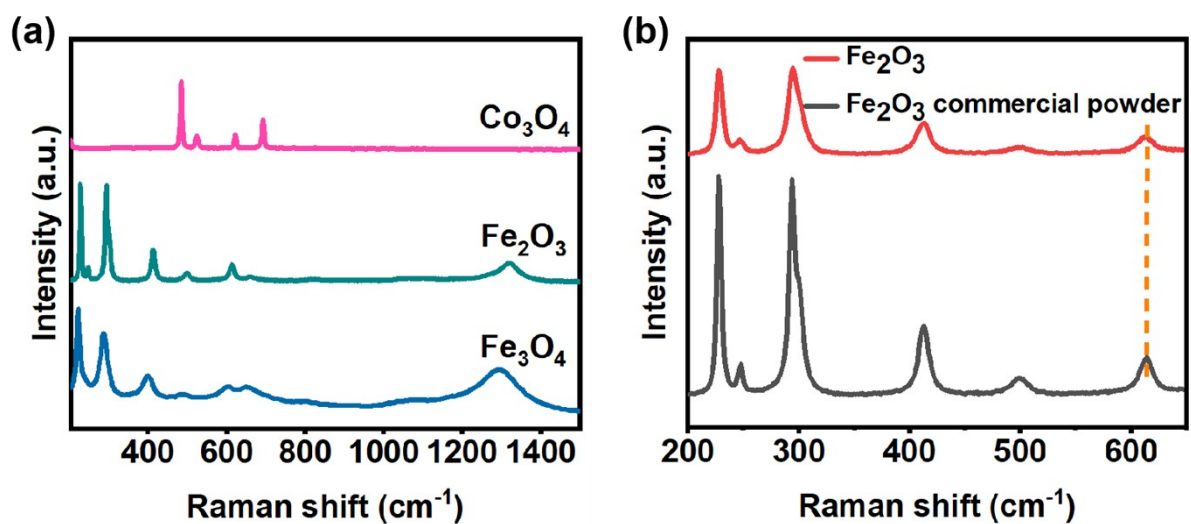

**Fig. S6** Raman spectra of (a) commercial powders  $\text{Co}_3\text{O}_4$ ,  $\text{Fe}_2\text{O}_3$  and  $\text{Fe}_3\text{O}_4$ . (b)  $\text{Fe}_2\text{O}_3$  and  $\text{Fe}_2\text{O}_3$  commercial powders

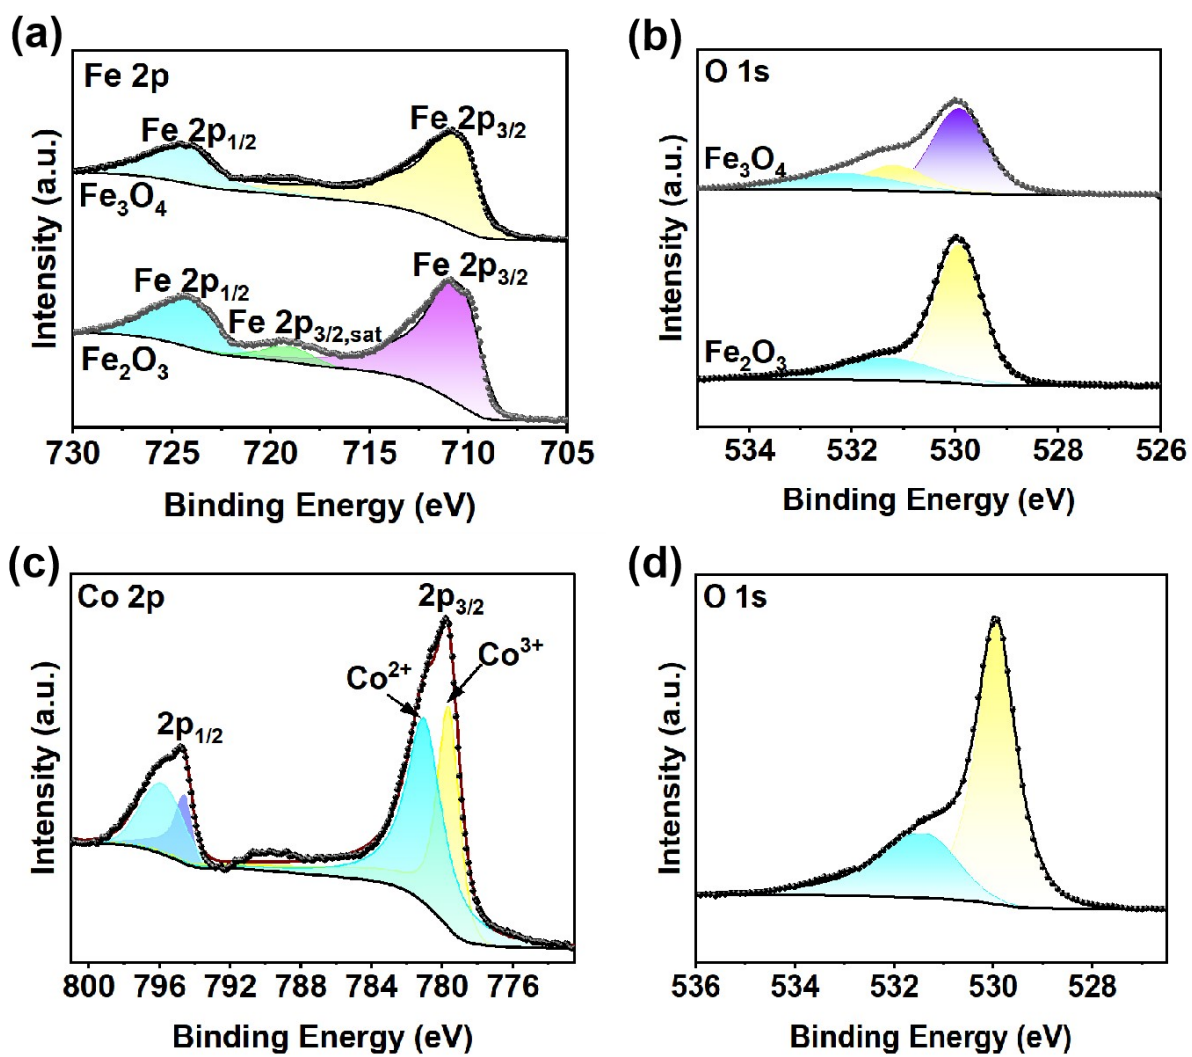

Fig. S7 XPS spectra of the porous nanoparticles after the reaction of (a) Fe 2p peaks of  $\text{Fe}_2\text{O}_3$  and  $\text{Fe}_3\text{O}_4$ , (b) O 1s peaks of  $\text{Fe}_2\text{O}_3$  and  $\text{Fe}_3\text{O}_4$ , (c) Co 2p peaks of  $\text{Co}_3\text{O}_4$ , and (d) O 1s peaks of  $\text{Co}_3\text{O}_4$ .



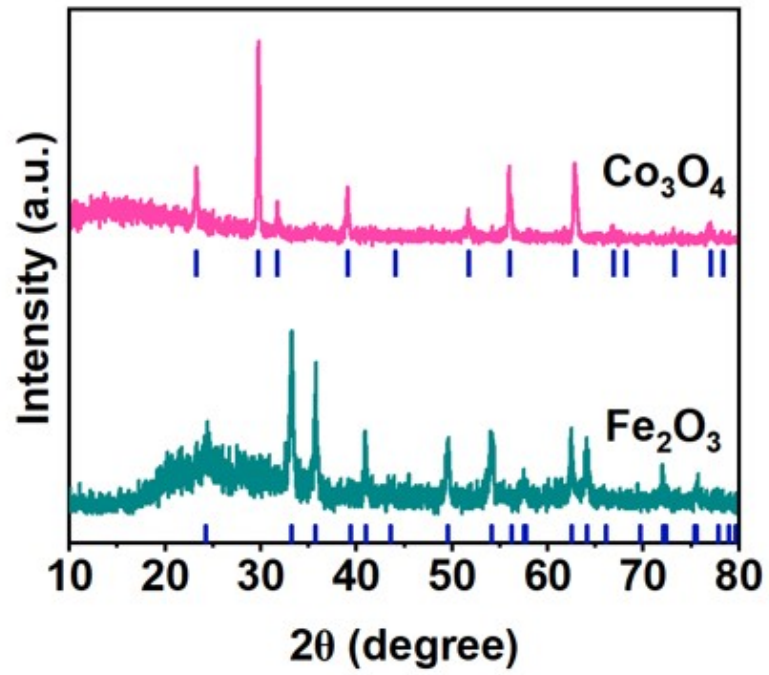

**Fig. S8** XRD of porous  $\text{Co}_3\text{O}_4$  and  $\text{Fe}_2\text{O}_3$  nanoparticles after 48 h long period of CO oxidation.

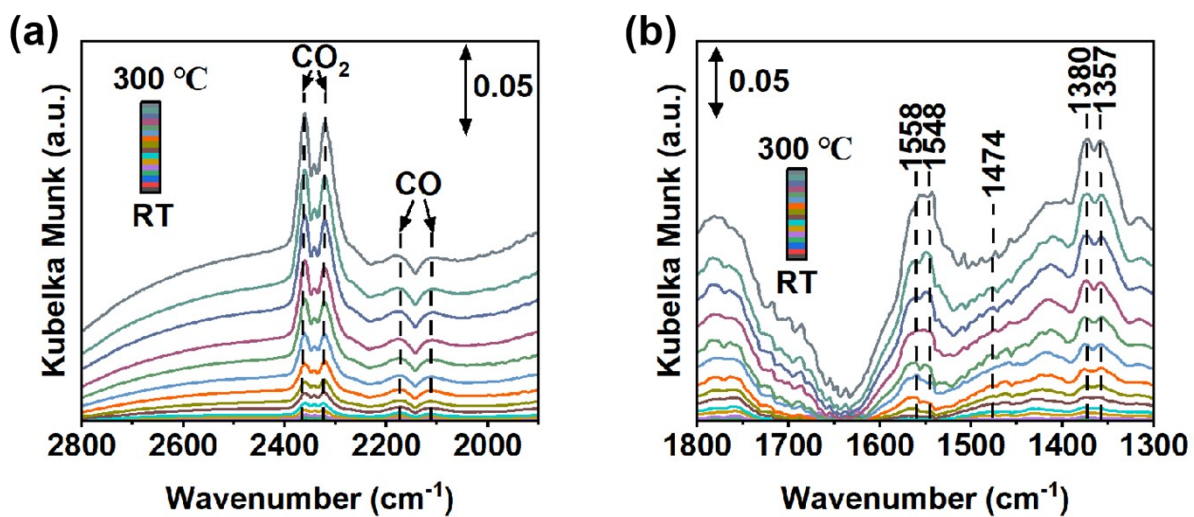

Fig. S9 *In situ* DRIFTS of porous  $\text{Fe}_2\text{O}_3$  nanoparticle under 1 vol% CO, 21 vol%  $\text{O}_2$  and 78 vol%  $\text{N}_2$  condition.

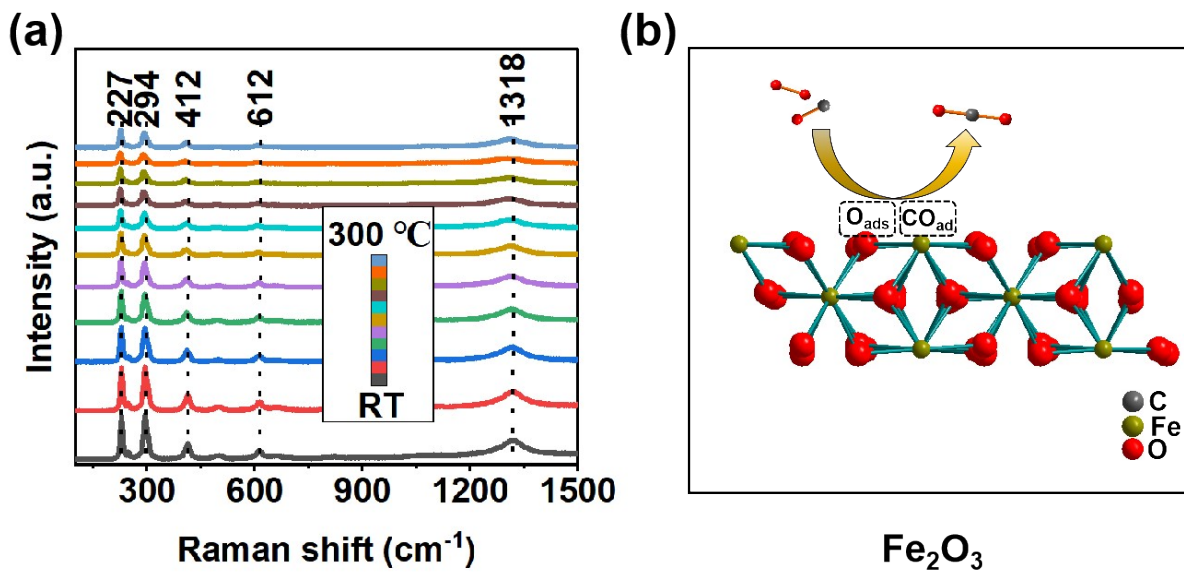

Fig. S10 (a) Raman spectra of  $\text{Fe}_2\text{O}_3$  at different temperatures, (b) Schematic diagram of carbon monoxide oxidation on  $\text{Fe}_2\text{O}_3$  surface

**Table. S1** Elemental analysis of N and C species in porous  $\text{Co}_3\text{O}_4$ ,  $\text{Fe}_2\text{O}_3$  and  $\text{Fe}_3\text{O}_4$  nanoparticles.

|                         | Element C content (wt%) | Element N content (wt%) |
|-------------------------|-------------------------|-------------------------|
| $\text{Co}_3\text{O}_4$ | $\leq 0.3$              | $\leq 0.3$              |
| $\text{Fe}_2\text{O}_3$ | $\leq 0.3$              | $\leq 0.3$              |
| $\text{Fe}_3\text{O}_4$ | $\leq 0.3$              | $\leq 0.3$              |

**Table. S2** Ratio of O species in porous Co<sub>3</sub>O<sub>4</sub>, Fe<sub>2</sub>O<sub>3</sub> and Fe<sub>3</sub>O<sub>4</sub> nanoparticles.

|                                | Before Reduction                                   |                                                   |
|--------------------------------|----------------------------------------------------|---------------------------------------------------|
|                                | $O_{\text{latt}}/(O_{\text{latt}}+O_{\text{ads}})$ | $O_{\text{ads}}/(O_{\text{latt}}+O_{\text{ads}})$ |
| Co <sub>3</sub> O <sub>4</sub> | 62.33%                                             | 37.67%                                            |
| Fe <sub>2</sub> O <sub>3</sub> | 70.77%                                             | 29.23%                                            |
| Fe <sub>3</sub> O <sub>4</sub> | 76.08%                                             | 23.92%                                            |

**Table. S3** Comparison of CO oxidation performances of different cobalt and iron oxides.

| Catalyst                       | Load content      | Reaction gas                                      | Flow Rate (mL min <sup>-1</sup> ) | Amount of catalyst used | Reaction temperature | Ref.      |
|--------------------------------|-------------------|---------------------------------------------------|-----------------------------------|-------------------------|----------------------|-----------|
| Co <sub>3</sub> O <sub>4</sub> | Ag                | CO/O <sub>2</sub> /N <sub>2</sub> = 1.6/21.4/77.0 | 25                                | 50mg                    | T100 = 120 °C        | [1]       |
| Co <sub>3</sub> O <sub>4</sub> | Ce <sub>2</sub> O | CO/O <sub>2</sub> /N <sub>2</sub> = 0.6:0.6:99.8  | 66.66                             | 50mg                    | T99 = 192 °C         | [2]       |
| Co <sub>3</sub> O <sub>4</sub> | SiO <sub>2</sub>  | CO/O <sub>2</sub> /N <sub>2</sub> = 0.4:8:91.6    | 150                               | 50mg                    | T50 = 158 °C         | [3]       |
| Co <sub>3</sub> O <sub>4</sub> |                   | CO/O <sub>2</sub> /He = 5:10:85                   | 50                                | 20mg                    | T100 = 175°C         | [4]       |
| Co <sub>3</sub> O <sub>4</sub> | Pt                | CO/O <sub>2</sub> /He = 2:5:43                    | 50                                | 10mg                    | T100 = ~140°C        | [5]       |
| Fe <sub>2</sub> O <sub>3</sub> |                   | CO/O <sub>2</sub> /(He+N <sub>2</sub> ) = 1:10:5  | 150                               | 150mg                   | T50 = 300°C          | [6]       |
| Fe <sub>2</sub> O <sub>3</sub> | pt                |                                                   |                                   |                         | T100 < 200°C         |           |
|                                |                   | CO/O <sub>2</sub> /N <sub>2</sub> = 2.4:2.4:95.2  | 100                               | 200mg                   |                      | [7]       |
| Fe <sub>3</sub> O <sub>4</sub> |                   |                                                   |                                   |                         | T20 < 300°C          |           |
| Co <sub>3</sub> O <sub>4</sub> |                   | CO/O <sub>2</sub> /N <sub>2</sub> = 1:21:78       | 50                                | 50mg                    | T90 = 127°C          | This work |
| Fe <sub>2</sub> O <sub>3</sub> |                   | CO/O <sub>2</sub> /N <sub>2</sub> = 1:21:78       | 50                                | 50mg                    | T90 = 267°C          | This work |
| Fe <sub>3</sub> O <sub>4</sub> |                   | CO/O <sub>2</sub> /N <sub>2</sub> = 1:21:78       | 50                                | 50mg                    | T20 = 275°C          | This work |

## References

1. L. Li, Q. Yang, C. Zhang, J. Yan, Y. Peng and J. Li, *ACS Applied Nano Materials*, 2019, **2**, 3480-3489.
2. C.-F. Liu, X.-F. Wang, C.-H. Wen, B. Li, C. Tang, J.-Q. Lu, M.-F. Luo and J. Chen, *Applied Surface Science*, 2023, **617**, 156572.
3. Z. Gao, D. Zhao, Q. Cheng, D. Zhao, Y. Yang, Y. Tian, T. Ding, S. Song, L. Guo and X. Li, *ChemCatChem*, 2021, **13**, 4010-4018.
4. L. Lukashuk, N. Yigit, H. Li, J. Bernardi, K. Föttinger and G. Rupprechter, *Catalysis Today*, 2019, **336**, 139-147.
5. D. Kim, D. Park, H. C. Song, B. Jeong, J. Lee, Y. Jung and J. Y. Park, *ACS Catalysis*, 2023, **13**, 5326-5335.
6. K. Narasimharao, A. Al-Shehri and S. Al-Thabaiti, *Applied Catalysis A: General*, 2015, **505**, 431-440.
7. D. Jain and G. Madras, *Industrial & Engineering Chemistry Research*, 2017, **56**, 2008-2024.
